# Supplementary material for: Identification of a novel candidate HSD3B2 gene variant for familial hypospadias by whole-exome sequencing
Source: Front Genet. 2023 Jun 13;14:1106933. doi: 10.3389/fgene.2023.1106933 (PMC10297146; doi:10.3389/fgene.2023.1106933)
Supplement: Supplementary file 3 [file Table3.xls]

## Sheet: Sheet2
Name	Protein change	Condition(s)	ClinVar_Accession	GRCh37Location	GRCh38Location	dbSNP ID
NM_000198.3(HSD3B2):c.-145G>A		Congenital adrenal hyperplasia	VCV000292254	119957770	119415147	rs35226381
NM_000198.4(HSD3B2):c.-106T>C		3 beta-Hydroxysteroid dehydrogenase deficiency	VCV000876143	119957809	119415186	rs587688647
NM_000198.4(HSD3B2):c.9G>A (p.Trp3Ter)	W3*	3 beta-Hydroxysteroid dehydrogenase deficiency	VCV000946461	119958051	119415428	rs765335418
NM_000198.4(HSD3B2):c.13T>A (p.Cys5Ser)	C5S	3 beta-Hydroxysteroid dehydrogenase deficiency	VCV000292255	119958055	119415432	rs376207606
NM_000198.4(HSD3B2):c.15C>A (p.Cys5Ter)	C5*	3 beta-Hydroxysteroid dehydrogenase deficiency	VCV001076441	119958057	119415434
NM_000198.4(HSD3B2):c.29C>A (p.Ala10Glu)	A10E	3 beta-Hydroxysteroid dehydrogenase deficiency	VCV000012188	119958071	119415448	rs28934880
NM_000198.4(HSD3B2):c.35G>A (p.Gly12Glu)	G12E	not provided	VCV001513071	119958077	119415454
NM_000198.4(HSD3B2):c.65dup (p.Leu22fs)	L22fs	not provided	VCV001451900	119958105 - 119958106	119415482 - 119415483
NC_000001.11:g.(?_119419408)_(119419592_?)del		not provided	VCV000654097	119962031 - 119962215	119419408 - 119419592
NM_000198.4(HSD3B2):c.143-1G>C		not provided	VCV001347611	119962040	119419417
NM_000198.4(HSD3B2):c.154_162delinsTCCTGTT (p.Arg52fs)	R52fs	not provided	VCV002086405	119962052 - 119962060	119419429 - 119419437
NM_000198.4(HSD3B2):c.216C>A (p.Cys72Ter)	C72*	not provided	VCV001445872	119962114	119419491
NM_000198.4(HSD3B2):c.222C>T (p.Asp74=)		3 beta-Hydroxysteroid dehydrogenase deficiency	VCV000292256	119962120	119419497	rs150892928
NM_000198.4(HSD3B2):c.244G>A (p.Ala82Thr)	A82T	3 beta-Hydroxysteroid dehydrogenase deficiency	VCV001070043	119962142	119419519
NM_000198.4(HSD3B2):c.274C>G (p.His92Asp)	H92D	Inborn genetic diseases	VCV002328204	119962172	119419549
NM_000198.4(HSD3B2):c.280G>C (p.Glu94Gln)	E94Q	not provided	VCV001694521	119962178	119419555
NM_000198.4(HSD3B2):c.295G>T (p.Val99Phe)	V99F	3 beta-Hydroxysteroid dehydrogenase deficiency	VCV001709722	119962193	119419570
NM_000198.4(HSD3B2):c.299A>G (p.Asn100Ser)	N100S	not provided	VCV001457738	119962197	119419574
NM_000198.4(HSD3B2):c.301G>T (p.Val101Leu)	V101L	not provided	VCV002140725	119962199	119419576
NM_000198.4(HSD3B2):c.307+1G>A		not provided	VCV001964067	119962206	119419583
NM_000198.4(HSD3B2):c.308-14C>A		3 beta-Hydroxysteroid dehydrogenase deficiency	VCV000876144	119964418	119421795	rs750286630
NM_000198.4(HSD3B2):c.308-9C>T		3 beta-Hydroxysteroid dehydrogenase deficiency|not specified|not provided	VCV000736354	119964423	119421800	rs375047799
NM_000198.4(HSD3B2):c.308-8G>A		3 beta-Hydroxysteroid dehydrogenase deficiency	VCV000292257	119964424	119421801	rs371712928
NM_000198.4(HSD3B2):c.308G>T (p.Gly103Val)	G103V	not provided	VCV002121074	119964432	119421809
NM_000198.4(HSD3B2):c.333T>G (p.Cys111Trp)	C111W	3 beta-Hydroxysteroid dehydrogenase deficiency	VCV000292258	119964457	119421834	rs886045196
NM_000198.4(HSD3B2):c.340del (p.Ala114fs)	A114fs	not provided	VCV001070432	119964464	119421841
NM_000198.4(HSD3B2):c.343_749del (p.Val116fs)	V116fs	not provided	VCV002128395	119964467 - 119964873	119421844 - 119422250
NM_000198.4(HSD3B2):c.374T>C (p.Ile125Thr)	I125T	not provided	VCV001931250	119964498	119421875
NM_000198.4(HSD3B2):c.376G>T (p.Glu126Ter)	E126*	Congenital adrenal hyperplasia	VCV001705245	119964500	119421877
NM_000198.4(HSD3B2):c.385G>A (p.Gly129Arg)	G129R	not provided	VCV000971607	119964509	119421886	rs587628683
NM_000198.4(HSD3B2):c.419G>A (p.Gly140Asp)	G140D	not provided	VCV001924324	119964543	119421920
NM_000198.4(HSD3B2):c.423C>T (p.His141=)		3 beta-Hydroxysteroid dehydrogenase deficiency	VCV000292259	119964547	119421924	rs751470493
NM_000198.4(HSD3B2):c.424G>A (p.Glu142Lys)	E142K	not provided	VCV000012190	119964548	119421925	rs80358219
NM_000198.4(HSD3B2):c.462C>A (p.Tyr154Ter)	Y154*	not provided	VCV000848651	119964586	119421963	rs1651890566
NM_000198.4(HSD3B2):c.465G>A (p.Pro155=)		3 beta-Hydroxysteroid dehydrogenase deficiency	VCV000715626	119964589	119421966	rs114527791
NM_000198.4(HSD3B2):c.497T>G (p.Leu166Arg)	L166R	not provided	VCV002151507	119964621	119421998
NM_000198.4(HSD3B2):c.500C>T (p.Ala167Val)	A167V	3 beta-Hydroxysteroid dehydrogenase deficiency	VCV000724290	119964624	119422001	rs35486059
NM_000198.4(HSD3B2):c.501G>A (p.Ala167=)		3 beta-Hydroxysteroid dehydrogenase deficiency	VCV000292260	119964625	119422002	rs6207
NM_000198.4(HSD3B2):c.507T>A (p.Asn169Lys)	N169K	Hypospadias 1, X-linked	VCV002413120	119964631	119422008
NM_000198.4(HSD3B2):c.510G>C (p.Gly170=)		3 beta-Hydroxysteroid dehydrogenase deficiency	VCV000292261	119964634	119422011	rs886045197
NM_000198.4(HSD3B2):c.512G>A (p.Trp171Ter)	W171*	not provided	VCV000012184	119964636	119422013	rs80358216
NM_000198.4(HSD3B2):c.518T>G (p.Leu173Arg)	L173R	Congenital adrenal hyperplasia|3 beta-Hydroxysteroid dehydrogenase deficiency	VCV000944811	119964642	119422019	rs762479018
NM_000198.4(HSD3B2):c.521A>C (p.Lys174Thr)	K174T	Inborn genetic diseases	VCV002315623	119964645	119422022
NM_000198.4(HSD3B2):c.540C>A (p.Tyr180Ter)	Y180*	not provided	VCV002202833	119964664	119422041
NM_000198.4(HSD3B2):c.551del (p.Ala183_Leu184insTer)		not provided	VCV000649860	119964674	119422051	rs1570822744
NM_000198.4(HSD3B2):c.558dup (p.Thr187fs)	T187fs	not provided	VCV000012185	119964679 - 119964680	119422056 - 119422057	rs770815049
NM_000198.4(HSD3B2):c.560C>T (p.Thr187Ile)	T187I	not specified	VCV001338458	119964684	119422061
NM_000198.4(HSD3B2):c.568T>C (p.Tyr190His)	Y190H	not provided	VCV001312395	119964692	119422069
NM_000198.4(HSD3B2):c.611C>A (p.Ala204Asp)	A204D	3 beta-Hydroxysteroid dehydrogenase deficiency	VCV001878508	119964735	119422112
NM_000198.4(HSD3B2):c.620del (p.Asn207fs)	N207fs	not provided	VCV002100356	119964743	119422120
NM_000198.4(HSD3B2):c.621C>T (p.Asn207=)		3 beta-Hydroxysteroid dehydrogenase deficiency	VCV000292262	119964745	119422122	rs143758913
NM_000198.4(HSD3B2):c.625G>A (p.Gly209Arg)	G209R	3 beta-Hydroxysteroid dehydrogenase deficiency	VCV000292263	119964749	119422126	rs587669956
NM_000198.4(HSD3B2):c.628A>G (p.Ile210Val)	I210V	3 beta-Hydroxysteroid dehydrogenase deficiency	VCV000990727	119964752	119422129	rs587741317
NM_000198.4(HSD3B2):c.659T>C (p.Val220Ala)	V220A	3 beta-Hydroxysteroid dehydrogenase deficiency	VCV000874297	119964783	119422160	rs929360018
NM_000198.4(HSD3B2):c.664C>A (p.Pro222Thr)	P222T	Congenital adrenal hyperplasia|3 beta-Hydroxysteroid dehydrogenase deficiency	VCV000012191	119964788	119422165	rs80358220
NM_000198.4(HSD3B2):c.665C>A (p.Pro222Gln)	P222Q	Congenital adrenal hyperplasia	VCV001722337	119964789	119422166
NM_000198.4(HSD3B2):c.682G>A (p.Val228Met)	V228M	not provided	VCV002160491	119964806	119422183
NM_000198.4(HSD3B2):c.690G>A (p.Trp230Ter)	W230*	not provided	VCV001456481	119964814	119422191
NM_000198.4(HSD3B2):c.692C>A (p.Ala231Asp)	A231D	not provided	VCV001954651	119964816	119422193
NM_000198.4(HSD3B2):c.707del (p.Ala235_Leu236insTer)		not provided	VCV001076576	119964830	119422207
NM_000198.4(HSD3B2):c.707T>C (p.Leu236Ser)	L236S	3 beta-Hydroxysteroid dehydrogenase deficiency	VCV000036370	119964831	119422208	rs35887327
NM_000198.4(HSD3B2):c.719G>A (p.Arg240Gln)	R240Q	not provided	VCV002058263	119964843	119422220
NM_000198.4(HSD3B2):c.742_746delinsAACT (p.Val248fs)	V248fs	not provided	VCV001913134	119964866 - 119964870	119422243 - 119422247
NM_000198.4(HSD3B2):c.742_743delinsAA (p.Val248Asn)	V248N		VCV000917499	119964866 - 119964867	119422243 - 119422244	rs121964896
NM_000198.4(HSD3B2):c.745C>T (p.Arg249Ter)	R249*	not provided	VCV000012187	119964869	119422246	rs80358217
NM_000198.4(HSD3B2):c.[742_743delinsAA;745C>T]	R249*, V248N	3 beta-Hydroxysteroid dehydrogenase deficiency	VCV000012186	119964869	119422246	rs80358217|rs121964896
NM_000198.4(HSD3B2):c.750T>C (p.Gly250=)		3 beta-Hydroxysteroid dehydrogenase deficiency	VCV000292264	119964874	119422251	rs755461071
NM_000198.4(HSD3B2):c.759T>G (p.Tyr253Ter)	Y253*	not provided	VCV000933431	119964883	119422260	rs1651909230
NM_000198.4(HSD3B2):c.776C>T (p.Thr259Met)	T259M	Congenital adrenal hyperplasia|3 beta-Hydroxysteroid dehydrogenase deficiency	VCV000012192	119964900	119422277	rs80358221
NM_000198.4(HSD3B2):c.778C>T (p.Pro260Ser)	P260S	not provided	VCV001466610	119964902	119422279
NM_000198.4(HSD3B2):c.783C>A (p.His261Gln)	H261Q	not provided	VCV002115538	119964907	119422284
NM_000198.4(HSD3B2):c.789C>G (p.Ser263Arg)	S263R	3 beta-Hydroxysteroid dehydrogenase deficiency	VCV000292266	119964913	119422290	rs771688849
NM_000198.4(HSD3B2):c.792_796del (p.Tyr264_Asn266delinsTer)		not provided	VCV001451753	119964914 - 119964918	119422291 - 119422295
NM_000198.4(HSD3B2):c.809T>C (p.Ile270Thr)	I270T	3 beta-Hydroxysteroid dehydrogenase deficiency	VCV000874298	119964933	119422310	rs75429891
NM_000198.4(HSD3B2):c.818_819del (p.Lys273fs)	K273fs	Congenital adrenal hyperplasia	VCV000586031	119964941 - 119964942	119422318 - 119422319	rs754609778
NM_000198.4(HSD3B2):c.829del (p.Leu277fs)	L277fs	not provided	VCV001456146	119964952	119422329
NM_000198.4(HSD3B2):c.849del (p.Arg282_Trp283insTer)		Congenital adrenal hyperplasia	VCV001722338	119964972	119422349
NM_000198.4(HSD3B2):c.867del (p.Met290fs)	M290fs	3 beta-Hydroxysteroid dehydrogenase deficiency	VCV000012193	119964991	119422368	rs767167623
NM_000198.4(HSD3B2):c.875G>A (p.Trp292Ter)	W292*	3 beta-Hydroxysteroid dehydrogenase deficiency	VCV001324550	119964999	119422376
NM_000198.4(HSD3B2):c.892del (p.Glu298fs)	E298fs	not provided	VCV001389517	119965015	119422392
NM_000198.4(HSD3B2):c.931C>T (p.Gln311Ter)	Q311*	not provided	VCV000937691	119965055	119422432	rs781213951
NM_000198.4(HSD3B2):c.946C>T (p.Arg316Cys)	R316C	not specified	VCV001804657	119965070	119422447
NM_000198.4(HSD3B2):c.960A>C (p.Thr320=)		3 beta-Hydroxysteroid dehydrogenase deficiency	VCV000726142	119965084	119422461	rs34412477
NM_000198.4(HSD3B2):c.965C>A (p.Ser322Ter)	S322*	not provided	VCV001073403	119965089	119422466
NM_000198.4(HSD3B2):c.986C>T (p.Ser329Phe)	S329F	Inborn genetic diseases	VCV002254261	119965110	119422487
NM_000198.4(HSD3B2):c.1000C>T (p.Gln334Ter)	Q334*	3 beta-Hydroxysteroid dehydrogenase deficiency	VCV000956384	119965124	119422501	rs905880501
NM_000198.4(HSD3B2):c.1003C>T (p.Arg335Ter)	R335*	3 beta-Hydroxysteroid dehydrogenase deficiency	VCV000597649	119965127	119422504	rs148200568
NM_000198.4(HSD3B2):c.1004G>A (p.Arg335Gln)	R335Q	Ependymoma	VCV000487802	119965128	119422505	rs985808078
NM_000198.4(HSD3B2):c.1012G>A (p.Ala338Thr)	A338T	3 beta-Hydroxysteroid dehydrogenase deficiency	VCV000874299	119965136	119422513	rs147383167
NM_000198.4(HSD3B2):c.1022C>T (p.Pro341Leu)	P341L	3 beta-Hydroxysteroid dehydrogenase deficiency	VCV000012194	119965146	119422523	rs121964897
NM_000198.4(HSD3B2):c.1034G>A (p.Trp345Ter)	W345*	not provided	VCV000664296	119965158	119422535	rs1570823863
NM_000198.4(HSD3B2):c.1055C>A (p.Thr352Asn)	T352N	Inborn genetic diseases	VCV002340729	119965179	119422556
NM_000198.4(HSD3B2):c.1055_1056delinsAA (p.Thr352Lys)	T352K	3 beta-Hydroxysteroid dehydrogenase deficiency	VCV001028127	119965179 - 119965180	119422556 - 119422557	rs1651920667
NM_000198.4(HSD3B2):c.1056C>G (p.Thr352=)		3 beta-Hydroxysteroid dehydrogenase deficiency	VCV000292267	119965180	119422557	rs781770416
NM_000198.4(HSD3B2):c.1064G>A (p.Trp355Ter)	W355*	3 beta-Hydroxysteroid dehydrogenase deficiency|Congenital adrenal hyperplasia	VCV000517183	119965188	119422565	rs767128094
NM_000198.4(HSD3B2):c.1082A>C (p.Asp361Ala)	D361A	not provided	VCV001924638	119965206	119422583
NM_000198.4(HSD3B2):c.1084C>T (p.Arg362Trp)	R362W	Congenital adrenal hyperplasia|3 beta-Hydroxysteroid dehydrogenase deficiency	VCV000292268	119965208	119422585	rs199919404
NM_000198.4(HSD3B2):c.1119A>C (p.Ter373Cys)		3 beta-Hydroxysteroid dehydrogenase deficiency	VCV000012189	119965243	119422620	rs80358218
NM_000198.4(HSD3B2):c.*9T>A		3 beta-Hydroxysteroid dehydrogenase deficiency	VCV000990730	119965252	119422629	rs1651924447
NM_000198.4(HSD3B2):c.*46C>T		3 beta-Hydroxysteroid dehydrogenase deficiency	VCV000292269	119965289	119422666	rs371081728
NM_000198.4(HSD3B2):c.*121C>A		3 beta-Hydroxysteroid dehydrogenase deficiency	VCV000292271	119965364	119422741	rs886045198
NM_000198.4(HSD3B2):c.*177C>T		3 beta-Hydroxysteroid dehydrogenase deficiency	VCV000292272	119965420	119422797	rs886045199
NM_000198.4(HSD3B2):c.*397T>A		3 beta-Hydroxysteroid dehydrogenase deficiency	VCV000292276	119965640	119423017	rs753468192
NM_000198.4(HSD3B2):c.*411T>C		3 beta-Hydroxysteroid dehydrogenase deficiency	VCV000876191	119965654	119423031	rs1651940686
NC_000001.10:g.(?_119466351)_(120286570_?)del		PHGDH deficiency	VCV002425620	119466351 - 120286570
GRCh37/hg19 1p12(chr1:119836835-120151604)x4		not provided	VCV001809129	119836835 - 120151604
GRCh37/hg19 1p13.3-11.2(chr1:111647582-121343783)		not specified	VCV001527270	111647582 - 121343783
NC_000001.10:g.(?_119964988)_(119988456_?)del		not provided	VCV001459401	119964988 - 119988456
NC_000001.10:g.(?_119427355)_(120529725_?)dup		Hajdu-Cheney syndrome	VCV001440997	119427355 - 120529725
NC_000001.10:g.(?_119618953)_(120311467_?)del		not provided	VCV001411990	119618953 - 120311467
GRCh37/hg19 1p12(chr1:119584796-120527495)x3		not provided	VCV001340543	119584796 - 120527495
NC_000001.11:g.(?_119415410)_(119422630_?)del		not provided	VCV000832762	119958033 - 119965253
GRCh37/hg19 1p12(chr1:119836834-120289623)x3		not provided	VCV000814119	119836834 - 120289623
GRCh37/hg19 1p12(chr1:119425395-120527495)x3		not provided	VCV000686601	119425395 - 120527495
GRCh37/hg19 1p36.33-q44(chr1:82154-249218992)x3		not provided	VCV000599669	82154 - 249218992
GRCh37/hg19 1p36.33-q44(chr1:47851-249228449)x3		not provided	VCV000599659	47851 - 249228449
GRCh37/hg19 1p22.1-11.2(chr1:93837992-121343783)x3		Microcephaly, Intellectual disability	VCV000443336	93837992 - 121343783
GRCh37/hg19 1p36.33-q44(chr1:849467-249224684)		Abnormality of the ear, Malformation of the heart and great vessels (obsolete HPO term), Short stature, Polydactyly	VCV000442387	849467 - 249224684
GRCh37/hg19 1p36.33-q44(chr1:849467-249224684)x3		Micrognathia, Syndactyly, Intrauterine growth retardation, Ventricular septal defect, Abnormal facial shape	VCV000442386	849467 - 249224684
GRCh37/hg19 1p12(chr1:119806427-120438201)x3		Developmental delay	VCV000395148	119806427 - 120438201
